# Supplementary material for: Characterization of Cyanobacterial Hydrocarbon Composition and Distribution of Biosynthetic Pathways
Source: PLoS One. 2014 Jan 27;9(1):e85140. doi: 10.1371/journal.pone.0085140 (PMC3903477; doi:10.1371/journal.pone.0085140)
Supplement: Table S2 — Sequence and Pathway Information. Table of genes used in this investigation (16S, OLS, FAAR, ADO) with Genbank accession numbers and JGI IMG ID numbers. NA = Not Applicable, UA = Unavailable, UNK = Unknown. (XLSX) [file pone.0085140.s008.xlsx]

## Sheet: Sheet1
	Table S2. Sequence and Pathway Information Table
1	Strain	16s	16s IMG ID	ADO IMG ID	FAAR IMG ID	OLS IMG
2	Acaryochloris marina MBIC11017	NR_074407	641250527	641253123	641253124	NA
3	Acaryochloris sp CCMEE 5410	AY790243	2514737087	2514737477	2514737476	NA
4	Anabaena (Nostoc) sp. PCC 7120	NR_074310	637000131	637235693	637235694	NA
5	Anabaena cylindrica PCC 7122	NR_102457	2504131113	2504133056	2504133057	NA
6	Anabaena sp. PCC 7108	AJ133162	2506492397	2506493736	2506493735	NA
7	Anabaena variabilis ATCC 29413	NR_074300	646566302	646568029	646568030	NA
8	Arthrospira maxima CS-328	UA	643170170	643170003	643170008	NA
9	Arthrospira platensis C1	UA	2507447852	2507452063	2507452057	NA
10	Arthrospira platensis NIES-39	AP011615	650385901	650388530	650388528	NA
11	Arthrospira platensis str. Paraca	UA	646129542	646127881	646130470	NA
12	Arthrospira sp. PCC 8005	UA	648280065	648385624	648385629	NA
13	Calothrix desertica PCC 7102	AM230699	2510023964	2510031331	2510031332	NA
14	Calothrix sp. PCC 6303	NR_102449	2504094582	2504097383	2504097384	NA
15	Calothrix sp. PCC 7103	FJ661010	2507483042	2507482447	2507482446	NA
16	Calothrix sp. PCC 7507	AM230678	2505800025	2505803909	2505803908	NA
17	cf. Tropicimarinus sp. PAB-10-Feb-10-1	KC986936	NA	UNK	UNK	UNK
18	Chamaesiphon sp. PCC 6605	NR_102450	2510436814	2510440152	2510441416	NA
19	Chlorogloeopsis fritschii PCC 6912	AB093489	NA	UNK	UNK	UNK
20	Chlorogloeopsis sp. PCC 7702	UA	2512631262	2512634881	2512634882	NA
21	Chroococcidiopsis sp. PCC 6712	AJ344557	2505784000	NA	NA	2505786305
22	Chroococcidiopsis thermalis PCC 7203	NR_102464	2503615230	2503611811	2503611810	NA
23	Crinalium epipsammum PCC 9333	CP003620	2504686391	2504686886	2504686883	NA
24	Crocosphaera watsonii WH 8501	UA	638430232	638429962	638432184	NA
25	Cyanobacterium sp. ESFC-1	JQ013010	2517649273	NA	NA	2517649087
26	Cyanobacterium aponinum PCC 10605	NR_102443	2503744442	2503745953	2503745326	NA
27	Cyanobacterium stanieri PCC 7202	NR_102450	2503366716	NA	NA	2503365672
28	Cyanobacterium sp JSC-1	UA	UA	2502183301	2502180669	NA
29	Cyanobacterium UCYN-A	CP001842	646529810	646530367	646530366	NA
30	Cyanobium gracile PCC 6307	CP003495	2508551987	2508550427, 2508551426	2508550426	NA
31	Cyanobium sp. PCC 7001	AB015058	647533516	647589062	647589063	NA
32	Cyanothece sp. ATCC 51472	NR_074316	2507499433	2507500974	2507501604	NA
33	Cyanothece sp. ATCC 51142	AF132771	641678476	641675248	641675909	NA
34	Cyanothece sp. CCY0110	UA	642525893	640626022	640626064	NA
35	Cyanothece sp. PCC 7424	AJ000715	643480496	NA	NA	643480134
36	Cyanothece sp. PCC 7425	CP001344	643583731	643583404, 643585964	643583405	NA
37	Cyanothece sp. PCC 7822	CP002198	648189115	NA	NA	648186796
38	Cyanothece sp. PCC 8801	NR_074265	643475451	643473564	643473965	NA
39	Cyanothece sp. PCC 8802	CP001701	644981629	644978504	644978915	NA
40	Cylindrospermopsis raciborskii CS-505	FM177492	647106692	647105250	647105249	NA
41	Cylindrospermum stagnale PCC 7417	CP003642	2509766311	2509766737	2509766736	NA
42	Dactylococcopsis salina PCC 8305	AJ000711	2509554813	2509554564	2509554566	NA
43	Dermocarpella incrassata PCC 7326	AJ344559	NA	UNK	UNK	UNK
44	Fischerella muscicola PCC 7414	AB039003	NA	UNK	UNK	UNK
45	Fischerella sp. JSC-11	HM636645	2505768419	2505768472	2505768473	NA
46	Fischerella sp. PCC 9339	UA	2517062088	2517060888	2517060889	NA
47	Fischerella sp. PCC 9431	UA	2512976007	2512979388	2512979387	NA
48	Fischerella sp. PCC 9605	UA	2516144612	2516149573	2516149572	NA
49	Geitlerinema sp. PCC 7105	AB039010	2510100366	2510100760	2510100761	NA
50	Geitlerinema sp. PCC 7407	UA	2503606330	2503607563	2503607564	NA
51	Geminocystis herdmanii PCC 6308	AB039001	2509875251	NA	NA	2509874923
52	Gloeobacter violaceus PCC 7421	NR_074282	640702702	637460552	637460551	NA
53	Gloeocapsa sp. PCC 7428	NR_102460	2503796883	2508644525	2508644526	NA
54	Gloeocapsa sp. PCC 73106	AF132784	2508647884	2503792698	2503792699	NA
55	Halothece sp. PCC 7418	NR_102451	2503637863	2503635677	2503635676	NA
56	Haplosiphon_welwitschii IC-52-3	AY034793	UA	KF690147	KF690145	NA
57	Leptolyngbya sp. BL0902	AY034793	UA	UNK	UNK	UNK
58	Leptolyngbya sp. PAC-10-03	KC207936	UA	UNK	UNK	UNK
59	Leptolyngbya boryana PCC 6306	EF429289	2509803511	2509805117	2509805118	NA
60	Leptolyngbya sp. PCC 6406	UA	2517691132	NA	NA	2517692617
61	Leptolyngbya sp. PCC 7375	AB039011	2509844872	2509844583, 2509848358	2509844584	NA
62	Leptolyngbya sp. PCC 7376	UA	2503890070	NA	NA	2503885842
63	Lyngbya sp. PCC 8106	AJ000714	640016911	640014937	640014936	NA
64	Mastigocladopsis repens MORA, PCC 10914	AJ544079	2517242812	2517242908	2517242909	NA
65	Microchaete sp. PCC 7126	UA	2509780314	2509779973	2509779974	NA
66	Microcoleus chthonoplastes PCC 7420	NR_102467	648027262	647568243	647568241	NA
67	Microcoleus sp. PCC 7113	UA	2509438379	2509436370	2509436372	NA
68	Microcoleus vaginatus FGP-2	UA	2506350421	2506347525	2506347524	NA
69	Microcystis aeruginosa NIES-843	NR_074314	641536100	641539328	641539327	NA
70	Moorea_producens_JHB	FJ151521	NA	NA	NA	KF550302
71	Moorea bouillonii PNG5-198	FJ041299	2515174312	NA	NA	KF550301
72	Moorea producens 3L	FJ151527	2502037738	NA	NA	2502033069
73	Moorea producens PAL-8-15-08-1	GQ231522	NA	UNK	UNK	UNK
74	Moorea producens PNG 4/22/06-1	FJ356669	NA	UNK	UNK	UNK
75	Nodosilinea nodulosa PCC 7104	AB039012	2509774871	2509777104	2509777103	NA
76	Nodularia spumigena CCY9414	UA	640026437	640023536	640023535	NA
77	Nostoc azollae 0708	UA	648049291	648051022	648051021	NA
78	Nostoc punctiforme PCC 73102	NR_074317	642555135	642600939	642600938	NA
79	Nostoc sp. PCC 7107	UA	2503739089	2503739659	2503739658	NA
80	Nostoc sp. PCC 7524	UA	2509809320	2509811872	2509811873	NA
82	Okeania comitata 3LOSC	EU244875	NA	UNK	UNK	UNK
83	Okeania hirsuta PAB-21-Jun-10-1	EU253967	NA	UNK	UNK	UNK
84	Okeania hirsuta PAB-10-Feb-10-1	KC986936	NA	UNK	UNK	UNK
85	Okeania sp. PAC-18-Feb-10-1.1	JQ899056	NA	UNK	UNK	UNK
81	Oscillatoria acuminata PCC 6304	NR_102463	2509424812	2509421282	2509421280	NA
86	Oscillatoria sp. PCC 6407	UA	2508874432	2508875245	2508875246	NA
87	Oscillatoria sp. PCC 7112	NR_102469	2504090174	2504087467	2504087468	NA
88	Oscillatoria sp. PCC 10802	UA	2509509360	2509511093	2509511094	NA
89	Oscillatoria sp. PCC 6506	UA	648300820	648856004	648856005	NA
90	Oscillatoriales sp. JSC-12	UA	2510065585	2510097721	2510097722	NA
91	Phormidium ISB3Nov94-8	UA	NA	KF447380	KF447379	NA
92	Planktothrix agardhii NIVA-CYA 126/8	AJ133166	NA	KF447382	KF447381	NA
93	Pleurocapsa sp. PCC 7319	AB039006	2509710144	NA	NA	2509706066
94	Pleurocapsa sp. PCC 7327	NR_102466	2509573033	NA	NA	2509575771
95	Prochlorococcus marinus str. AS9601	UA	640069308	640078300	640078301	NA
96	Prochlorococcus marinus str. MIT 9202	UA	647533946	647673545, 647673546	647673547	NA
97	Prochlorococcus marinus str. MIT 9211	UA	641228506	641284894	641284895	NA
98	Prochlorococcus marinus str. MIT 9215	CP000825	640753095	640943216	640943217	NA
99	Prochlorococcus marinus str. MIT 9301	UA	640069346	640160138	640160139	NA
100	Prochlorococcus marinus str. MIT 9303	UA	640069312	640086288	640086289, 640086290	NA
101	Prochlorococcus marinus str. MIT 9312	AF053398	637000448	637797052	637797053	NA
102	Prochlorococcus marinus str. MIT 9313	BX548175	637000238	637447923	637447922	NA
103	Prochlorococcus marinus str. MIT 9515	UA	640069309	640080273	640080274	NA
104	Prochlorococcus marinus str. NATL1A	AF311218	640069311	640083865	640083866	NA
105	Prochlorococcus marinus str. NATL2A	AF311219	637000388	637688756	637688757	NA
106	Prochlorococcus marinus subsp. marinus str. CCMP1375	NR_074172	637000234	637440945	637440946	NA
107	Prochlorococcus marinus subsp. pastoris str. CCMP1986	UA	637000239	637449539	637449540	NA
108	Prochloron_didemni_P1_Palau	AGRF01000017	NA	NA	NA	HQ407367
109	Prochlorothrix hollandica PCC 9006	AF132792	2509500491	2509500953	2509500952	NA
110	Pseudanabaena sp. PCC 6802	AB039016	2507085377	2507089656	2507089657	NA
111	Pseudanabaena sp. PCC 7367	NR_102446	2504679805	2504682094	2504682095	NA
112	Pseudanabaena sp. PCC 7429	UA	2504582855	2504582283	2504582284	NA
113	Raphidiopsis brookii D9 D9_23	EU552069	647008336	647109775	647109776	NA
114	Rivularia sp. PCC 7116	NR_102458	2510090402	2510088936	2510088937	NA
115	Scytonema hofmanni UTEX 2349	UA	2507332731	2507334748	2507334747	NA
116	Spirulina major PCC 6313	UA	2506609383	2506609003	2506609002	NA
117	Spirulina sp. PCC 9445	UA	2506600536	2506600578	2506600577	NA
118	Stanieria cyanosphaera PCC 7437	NR_102468	2503798462	NA	NA	2503802227
119	Synechococcus elongatus PCC 6301	NR_074309	637000332	637615690	637615691	NA
120	Synechococcus elongatus PCC 7942	AF132930	637000450	637800026	637800027	NA
121	Synechococcus sp. BL107	UA	639857901	639886450	639886451	NA
122	Synechococcus sp. CB0101	UA	UA	650128583, 650129463	650128582	NA
123	Synechococcus sp. CB0205	UA	650130613	650132347	650132346	NA
124	Synechococcus sp. CC9311	AY172801	637000608	638115578	638115577	NA
125	Synechococcus sp. CC9605	AY172802	637000441	637775328	637775329	NA
126	Synechococcus sp. CC9902	UA	637000438	637771826	637771825	NA
127	Synechococcus sp. CC9616	UA	2517093774	2517172562	2517172563	NA
128	Synechococcus sp. JA-2-3b	UA	637000493	637876837	637876836	NA
129	Synechococcus sp. JA-3-3Ab	AY884052	637000492	637872006	637872005	NA
130	Synechococcus sp. PCC 6312	UA	2509428214	2509430321	2509429552	NA
131	Synechococcus sp. PCC 7002	AJ000716	641522658	NA	NA	641611183
132	Synechococcus sp. PCC 7335	UA	647533460	647576943	647576942	NA
133	Synechococcus sp. PCC 7336	AF448078	2506748035	2506746454	2506746453	NA
134	Synechococcus sp. PCC 7502	UA	2508690141	2508690078	2508690077	NA
135	Synechococcus sp. RCC307	UA	640427175	640546533	640546532	NA
136	Synechococcus sp. RS9916	AY172826	639857904	639889634	639889635	NA
137	Synechococcus sp. RS9917	AY172827	638366928	638962046, 638962649	638962047	NA
138	Synechococcus sp. WH 5701	AY172832	638366796	UA	UA	NA
139	Synechococcus sp. WH 7803	AF311291	640427174	640543006	640543007	NA
140	Synechococcus sp. WH 7805	AF001478	638367639	UA	UA	NA
141	Synechococcus sp. WH 8016	AY172834	2507281848	2507494277	2507494278	NA
142	Synechococcus sp. WH 8102	AF311293	637000237	637445856	637445855	NA
143	Synechococcus sp. WH 8109	AY172836	647535424	647835956	647835957	NA
144	Synechococcus sp. WH 5701	AY172832	638960280	638959747	638959746	NA
145	Synechococcus sp. WH 7805	AF001478	642511096	639019953	639019954	NA
146	Synechocystis sp. PCC 6803	AP012205	2509875251	637011715	637011714	NA
147	Synechocystis sp. PCC 7509	UA	2517581345	2517699535	2517699534	NA
148	Thermosynechococcus elongatus BP-1	NR_074328	637000169	637313936	637313935	NA
149	Tolypothrix sp. PCC 9009	UA	2504923835	Unk	Unk	NA
150	Trichodesmium erythraeum IMS101	NR_074275	637000606	638107379	638107378	NA
151	Westiella_intricata_HT-29-1	UA	NA	KF690148	KF690146	NA
152	Xenococcus sp. PCC 7305	AF132783	2508653320	NA	NA	2508650850
