# Supplementary material for: Characterization of Cyanobacterial Hydrocarbon Composition and Distribution of Biosynthetic Pathways
Source: PLoS One. 2014 Jan 27;9(1):e85140. doi: 10.1371/journal.pone.0085140 (PMC3903477; doi:10.1371/journal.pone.0085140)
Supplement: Table S3 — Genome and OLS gene percent GC for all 17 OLS pathway containing cyanobacteria. Genome status is indicated (P-Permanent Draft, F-Finished, D-Draft). Leptolyngbya sp. PCC 6406 exhibits a higher GC content in its OLS pathway compared to its genome, as well as compared to other OLS pathways and their genomes. (XLSX) [file pone.0085140.s009.xlsx]

## Sheet: Sheet1
Table S3. Genome and OLS Pathway GC Content
Genome	Genome GC%	Ols gene GC%	Status
Leptolyngbya sp. PCC 6406	55	64	P
Synechococcus sp. PCC 7002	49	53	F
Cyanobacterium sp. ESFC-1	47	51	P
Pleurocapsa sp. PCC 7327	45	44	F
Leptolyngbya sp. PCC 7376	44	47	F
Moorea producens 3L	44	47	D
Moorea bouillonii PNG 5-198	44	47	D
Moorea producens JHB	42	47	D
Prochloron didemni P1-Palau	42	44	D
Cyanothece sp. PCC 7822	40	44	F
Xenococcus sp. PCC 7305	40	43	D
Cyanothece sp. PCC 7424	39	42	F
Cyanobacterium stanieri PCC 7202	39	40	F
Pleurocapsa sp. PCC 7319	39	42	P
Stanieria cyanosphaera PCC 7437	36	38	F
Chroococcidiopsis sp. PCC 6712	35	38	F
Geminocystis herdmanii PCC 6308	34	38	P
